# Supplementary material
Source: PubMed Central journal article supplement (PMC4826323)

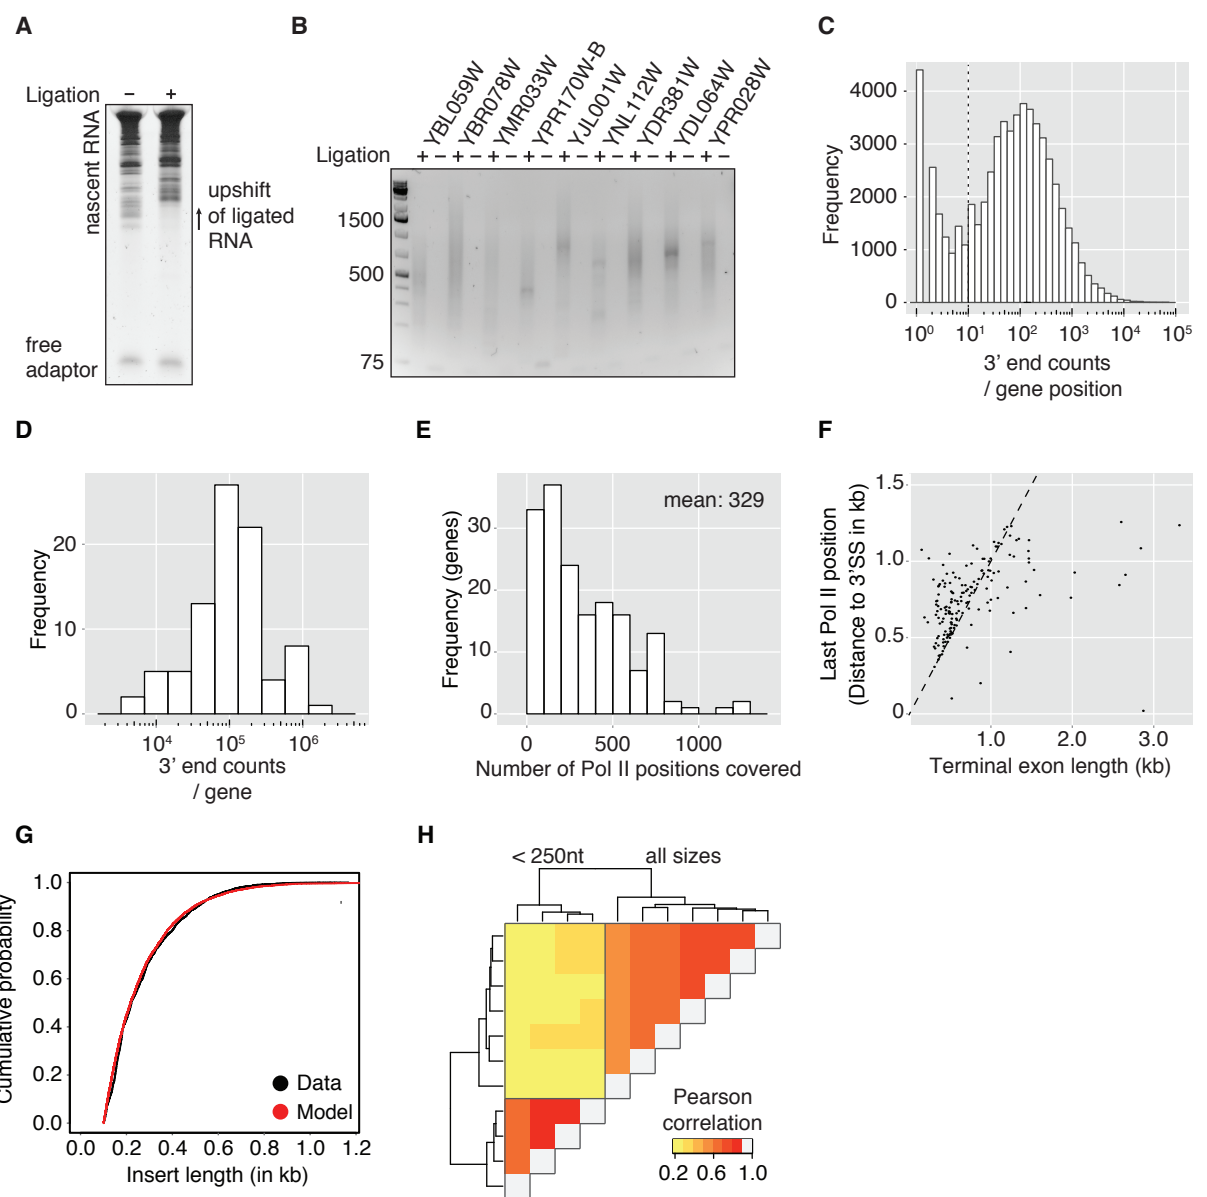

Supplement: NIHMS763922-supplement-1.pdf [file NIHMS763922-supplement-1.pdf]

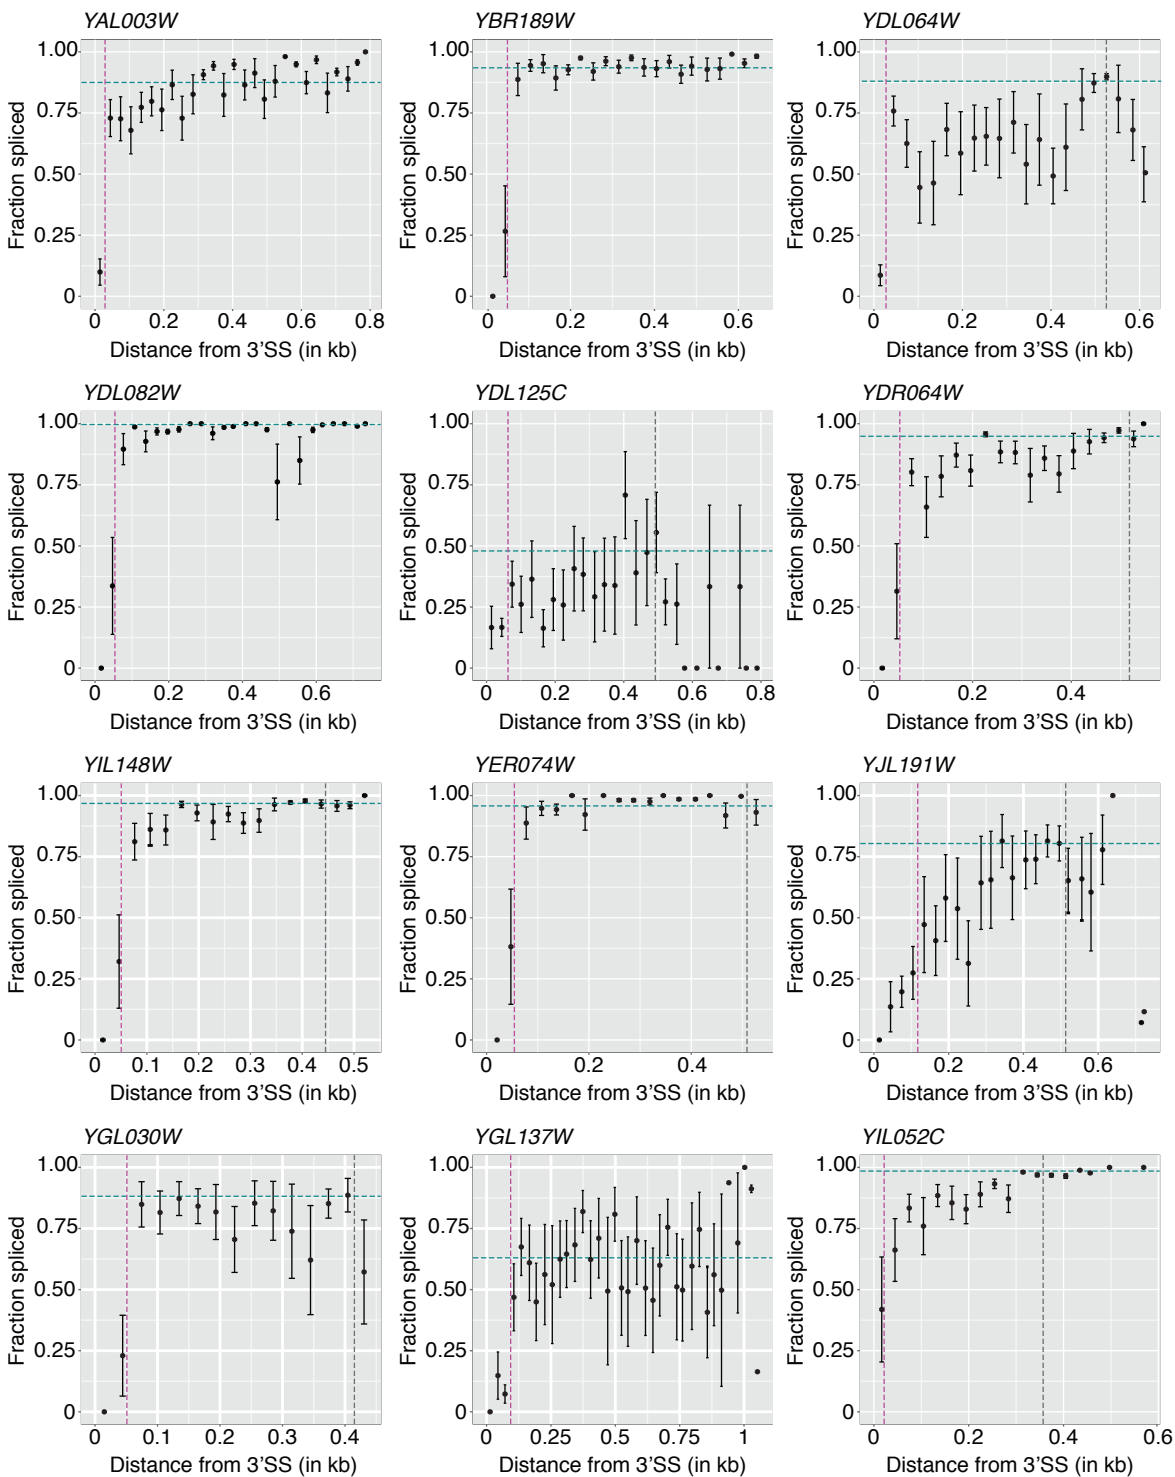

Supplement: NIHMS763922-supplement-2.pdf [file NIHMS763922-supplement-2.pdf]

**A**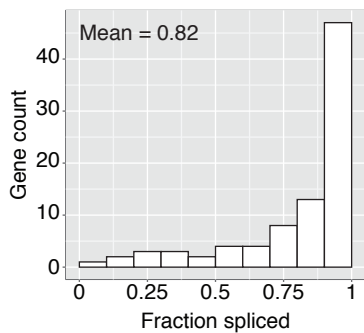**B**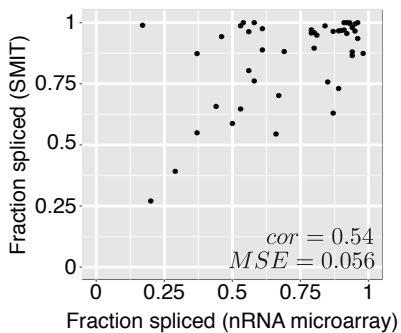

Supplement: NIHMS763922-supplement-3.pdf [file NIHMS763922-supplement-3.pdf]

**A**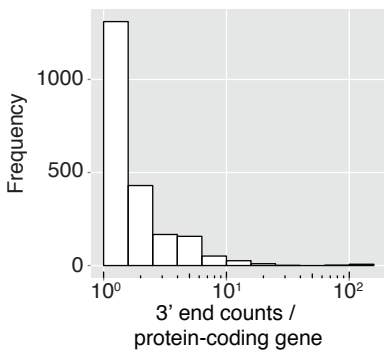**B**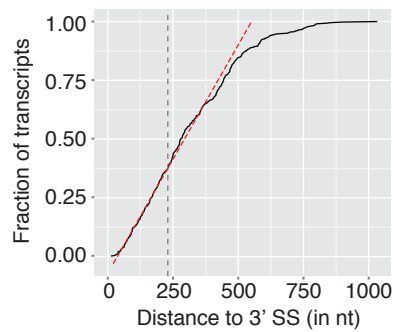

Supplement: NIHMS763922-supplement-4.pdf [file NIHMS763922-supplement-4.pdf]

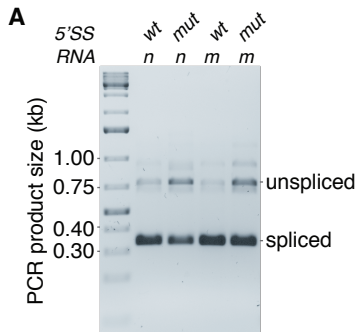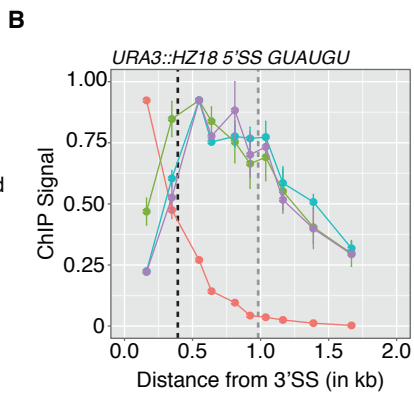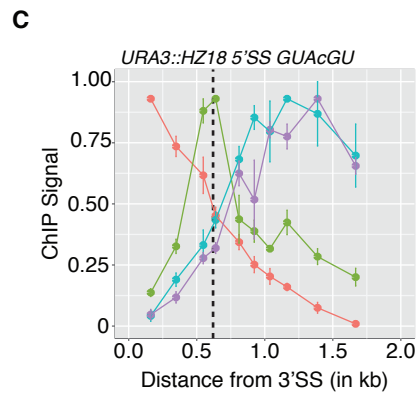

■ U1-snRNP (Prp40)   
 ■ U2-snRNP (Msl1)   
 ■ U5-snRNP (Brr2)   
 ■ NTC (Prp19)

Supplement: NIHMS763922-supplement-5.pdf [file NIHMS763922-supplement-5.pdf]

**A**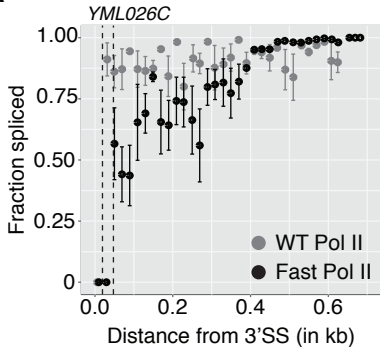**B**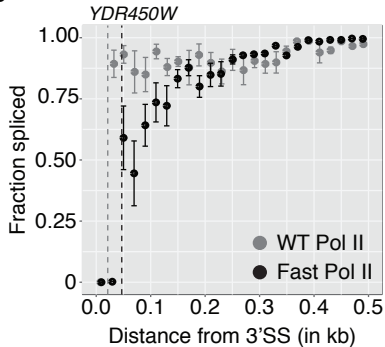

Supplement: NIHMS763922-supplement-6.pdf [file NIHMS763922-supplement-6.pdf]
